# Supplementary material for: Genetic Variation in the Glycoprotein B Sequence of Equid Herpesvirus 5 among Horses of Various Breeds at Polish National Studs
Source: MDPI journal article supplement (doi:10.3390/pathogens10030322), 2021-03-09
Supplement: s1 [file s1]

**Table S1.** Source of EHV-5 viruses included in the study.

| No | Sequence ID     | Horse breed <sup>1</sup> | Stud farm | Age Group (years) | Respiratory disease | Putative recombinant |
|----|-----------------|--------------------------|-----------|-------------------|---------------------|----------------------|
| 1  | POL_EHV5_I_1    | Arabian (M1)             | I         | 11 - 15           | No                  | No                   |
| 2  | POL_EHV5_I_2    | Arabian (F1)             | I         | < 1               | No                  | No                   |
| 3  | POL_EHV5_I_3    | Arabian (M2)             | I         | 6 - 10            | No                  | No                   |
| 4  | POL_EHV5_I_4    | Arabian (F2)             | I         | < 1               | No                  | Yes                  |
| 5  | POL_EHV5_I_5    | Arabian (M3)             | I         | 2 - 5             | No                  | No                   |
| 6  | POL_EHV5_I_6    | Arabian (F3)             | I         | < 1               | No                  | No                   |
| 7  | POL_EHV5_I_11   | Arabian                  | I         | < 1               | No                  | No                   |
| 8  | POL_EHV5_I_12   | Arabian                  | I         | < 1               | No                  | Yes                  |
| 9  | POL_EHV5_I_13   | Arabian                  | I         | < 1               | No                  | No                   |
| 10 | POL_EHV5_I_14   | Arabian                  | I         | < 1               | No                  | No                   |
| 11 | POL_EHV5_I_15   | Arabian                  | I         | < 1               | No                  | No                   |
| 12 | POL_EHV5_I_16   | Arabian                  | I         | < 1               | No                  | No                   |
| 13 | POL_EHV5_I_17   | Arabian                  | I         | < 1               | No                  | No                   |
| 14 | POL_EHV5_I_18   | Arabian                  | I         | < 1               | No                  | No                   |
| 15 | POL_EHV5_I_19   | Arabian                  | I         | < 1               | No                  | No                   |
| 16 | POL_EHV5_I_20   | Arabian                  | I         | < 1               | No                  | No                   |
| 17 | POL_EHV5_I_21   | Arabian                  | I         | 1                 | No                  | Yes                  |
| 18 | POL_EHV5_I_22   | Arabian                  | I         | 1                 | No                  | No                   |
| 19 | POL_EHV5_I_23   | Arabian                  | I         | 1                 | No                  | No                   |
| 20 | POL_EHV5_II_24  | Arabian                  | II        | < 1               | Yes                 | No                   |
| 21 | POL_EHV5_II_25  | Arabian                  | II        | < 1               | Yes                 | No                   |
| 22 | POL_EHV5_II_26  | Arabian                  | II        | < 1               | Yes                 | No                   |
| 23 | POL_EHV5_II_27  | Arabian                  | II        | 6 - 10            | Yes                 | Yes                  |
| 24 | POL_EHV5_III_28 | Arabian                  | III       | 1                 | Yes                 | No                   |
| 25 | POL_EHV5_III_29 | Arabian                  | III       | 1                 | Yes                 | Yes                  |
| 26 | POL_EHV5_III_30 | Arabian                  | III       | 1                 | Yes                 | No                   |
| 27 | POL_EHV5_III_31 | Arabian                  | III       | 1                 | Yes                 | No                   |
| 28 | POL_EHV5_III_32 | Arabian                  | III       | 1                 | Yes                 | No                   |
| 29 | POL_EHV5_III_33 | Arabian                  | III       | 1                 | Yes                 | No                   |
| 30 | POL_EHV5_III_34 | Arabian                  | III       | 1                 | Yes                 | No                   |
| 31 | POL_EHV5_III_35 | Arabian                  | III       | 1                 | Yes                 | No                   |
| 32 | POL_EHV5_III_36 | Arabian                  | III       | 1                 | Yes                 | No                   |
| 33 | POL_EHV5_IV_37  | Hucul horse              | IV        | 2 - 5             | No                  | No                   |
| 34 | POL_EHV5_IV_38  | Hucul horse              | IV        | 1                 | No                  | No                   |
| 35 | POL_EHV5_IV_39  | Hucul horse              | IV        | 2 - 5             | No                  | No                   |
| 36 | POL_EHV5_IV_40  | Hucul horse              | IV        | 1                 | No                  | No                   |
| 37 | POL_EHV5_IV_41  | Hucul horse              | IV        | 1                 | No                  | No                   |
| 38 | POL_EHV5_IV_42  | Hucul horse              | IV        | 2 - 5             | No                  | No                   |
| 39 | POL_EHV5_IV_43  | Hucul horse              | IV        | 2 - 5             | No                  | No                   |
| 40 | POL_EHV5_V_44   | Malopolska horse         | V         | 11 - 15           | No                  | No                   |

|    |                  |                    |      |         |    |     |
|----|------------------|--------------------|------|---------|----|-----|
| 41 | POL_EHV5_V_45    | Malopolska horse   | V    | 1       | No | Yes |
| 42 | POL_EHV5_V_46    | Malopolska horse   | V    | 1       | No | Yes |
| 43 | POL_EHV5_V_47    | Malopolska horse   | V    | 2 - 5   | No | No  |
| 44 | POL_EHV5_V_48    | Malopolska horse   | V    | 2 - 5   | No | No  |
| 45 | POL_EHV5_V_49    | Malopolska horse   | V    | 1       | No | No  |
| 46 | POL_EHV5_VI_50   | Polish Halfbred    | VI   | 11 - 15 | No | No  |
| 47 | POL_EHV5_VI_51   | Polish Halfbred    | VI   | < 1     | No | No  |
| 48 | POL_EHV5_VI_52   | Polish Halfbred    | VI   | 16+     | No | No  |
| 49 | POL_EHV5_VII_53  | Wielkopolska horse | VII  | 11 - 15 | No | No  |
| 50 | POL_EHV5_VII_54  | Wielkopolska horse | VII  | 2 - 5   | No | No  |
| 51 | POL_EHV5_VII_55  | Wielkopolska horse | VII  | 11 - 15 | No | No  |
| 52 | POL_EHV5_VII_56  | Wielkopolska horse | VII  | 2 - 5   | No | No  |
| 53 | POL_EHV5_VII_57  | Wielkopolska horse | VII  | 2 - 5   | No | Yes |
| 54 | POL_EHV5_VII_58  | Wielkopolska horse | VII  | 2 - 5   | No | No  |
| 55 | POL_EHV5_VII_59  | Wielkopolska horse | VII  | 2 - 5   | No | No  |
| 56 | POL_EHV5_VII_60  | Wielkopolska horse | VII  | < 1     | No | No  |
| 57 | POL_EHV5_VII_61  | Wielkopolska horse | VII  | < 1     | No | No  |
| 58 | POL_EHV5_VII_62  | Wielkopolska horse | VII  | < 1     | No | No  |
| 59 | POL_EHV5_VII_64  | Wielkopolska horse | VII  | 2 - 5   | No | No  |
| 60 | POL_EHV5_VIII_66 | Wielkopolska horse | VIII | 2 - 5   | No | No  |
| 61 | POL_EHV5_VIII_67 | Wielkopolska horse | VIII | 6 - 10  | No | No  |
| 62 | POL_EHV5_VIII_68 | Wielkopolska horse | VIII | < 1     | No | No  |
| 63 | POL_EHV5_VIII_69 | Wielkopolska horse | VIII | 6 - 10  | No | No  |
| 64 | POL_EHV5_IX_70   | Wielkopolska horse | IX   | < 1     | No | No  |
| 65 | POL_EHV5_IX_71   | Wielkopolska horse | IX   | < 1     | No | Yes |
| 66 | POL_EHV5_X_74    | Silesian horse     | X    | 6 - 10  | No | No  |
| 67 | POL_EHV5_X_75    | Silesian horse     | X    | 2 - 5   | No | No  |
| 68 | POL_EHV5_X_76    | Silesian horse     | X    | 6 - 10  | No | No  |
| 69 | POL_EHV5_XI_77   | Thoroughbred       | XI   | 1       | No | No  |
| 70 | POL_EHV5_XI_78   | Thoroughbred       | XI   | 1       | No | No  |
| 71 | POL_EHV5_XI_79   | Thoroughbred       | XI   | 1       | No | No  |
| 72 | POL_EHV5_XI_80   | Thoroughbred       | XI   | 11 - 15 | No | No  |
| 73 | POL_EHV5_XI_81   | Thoroughbred       | XI   | < 1     | No | Yes |
| 74 | POL_EHV5_XI_82   | Thoroughbred       | XI   | 11 - 15 | No | Yes |
| 75 | POL_EHV5_XI_83   | Thoroughbred       | XI   | 11 - 15 | No | No  |
| 76 | POL_EHV5_XI_84   | Thoroughbred       | XI   | 6 - 10  | No | No  |
| 77 | POL_EHV5_XI_85   | Thoroughbred       | XI   | 11 - 15 | No | No  |
| 78 | POL_EHV5_XI_86   | Thoroughbred       | XI   | 1       | No | No  |
| 79 | POL_EHV5_XI_87   | Thoroughbred       | XI   | 1       | No | No  |
| 80 | POL_EHV5_XI_88   | Thoroughbred       | XI   | 1       | No | No  |
| 81 | POL_EHV5_XII_89  | Polish Coldblood   | XII  | 1       | No | No  |
| 82 | POL_EHV5_XII_90  | Polish Coldblood   | XII  | 1       | No | No  |
| 83 | POL_EHV5_XII_91  | Polish Coldblood   | XII  | 1       | No | No  |
| 84 | POL_EHV5_XII_92  | Polish Coldblood   | XII  | 1       | No | No  |
| 85 | POL_EHV5_XII_93  | Polish Coldblood   | XII  | 1       | No | No  |

|    |                   |                  |      |        |    |     |
|----|-------------------|------------------|------|--------|----|-----|
| 86 | POL_EHV5_XII_94   | Polish Coldblood | XII  | 1      | No | Yes |
| 87 | POL_EHV5_XII_95   | Polish Coldblood | XII  | 1      | No | Yes |
| 88 | POL_EHV5_XII_96   | Polish Coldblood | XII  | 1      | No | Yes |
| 89 | POL_EHV5_XIII_97  | Polish Konik     | XIII | 6 - 10 | No | No  |
| 90 | POL_EHV5_XIII_98  | Polish Konik     | XIII | 2 - 5  | No | No  |
| 91 | POL_EHV5_XIII_99  | Polish Konik     | XIII | 1      | No | No  |
| 92 | POL_EHV5_XIII_100 | Polish Konik     | XIII | 2 - 5  | No | No  |
